# Supplementary material for: Expression and Prognostic Significance of CD47–SIRPA Macrophage Checkpoint Molecules in Colorectal Cancer
Source: PubMed Central journal article supplement (PMC7975978; doi:10.3390/ijms22052690), 2021-03-07
Supplement: ijms-22-02690-s001.pdf [file ijms-22-02690-s001.pdf]

# Supplementary Materials: Expression and Prognostic Significance of CD47–SIRPA Macrophage Checkpoint Molecules in Colorectal Cancer

Akane Sugimura-Nagata, Akira Koshino, Satoshi Inoue, Aya Matsuo-Nagano, Masayuki Komura, Miho Riku, Hideaki Ito, Akihito Inoko, Hideki Murakami, Masahide Ebi, Naotaka Ogasawara, Toyonori Tsuzuki, Satoru Takahashi, Kunio Kasugai, Kenji Kasai, and Shingo Inaguma

**Supplementary Table S1.** Antibodies and conditions for immunohistochemistry. BM, Leica BondMax; IV, Ventana iView reagent; OV, Ventana OptiView reagent. Antigen retrieval was performed with heat activation in high pH buffer.

| Genes | Reagent   | DAB             |                 | Fluorescent |          | Antibodies                                            |
|-------|-----------|-----------------|-----------------|-------------|----------|-------------------------------------------------------|
|       |           | Dilution        | Dilution        | Dilution    | Dilution |                                                       |
| CD163 | BM        | 200             | 100             |             |          | 10D6, Leica Biosystems (Bannockburn, IL)              |
| CD47  | BM        | 200             | -               |             |          | SP279, Abcam (Cambridge, UK)                          |
| CD68  | BM        | 2 (pre-diluted) | 1 (pre-diluted) |             |          | PG-M1, Nichirei Bioscience (Tokyo, Japan)             |
| MLH1  | OV        | 200             | -               |             |          | Clone G168-728, BD Biosciences, (Franklin Lakes, NJ)  |
| MSH2  | OV        | 200             | -               |             |          | Clone G219-1129, BD Biosciences, (Franklin Lakes, NJ) |
| MSH6  | OV        | 400             | -               |             |          | Clone 44/MSH6, BD Biosciences, (Franklin Lakes, NJ)   |
| PMS2  | OV+Linker | 50              | -               |             |          | Clone A16-4, BD Biosciences, (Franklin Lakes, NJ)     |
| SIRPA | IV        | 100             | 100             |             |          | EPR22930-163, Abcam (Cambridge, UK)                   |

**Supplementary Table S2.** Concordance rate of initial immunostaining Evaluation.

| Immunohistochemistry | Concordance Rate (%) | k coefficient | 95% Confidence Interval |      |
|----------------------|----------------------|---------------|-------------------------|------|
|                      |                      |               | Min                     | Max  |
| CD47                 | 82.7                 | 0.63          | 0.54                    | 0.73 |

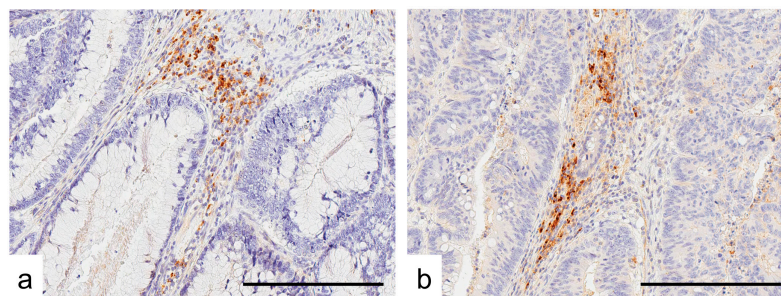

**Supplementary Figure S1.** Representative images for CRCs without CD47 expression. a and b, both CRC cases expressed CD47 at under-detectable levels. Note that TAIs with CD47 expression are seen. Bar, 200  $\mu$ m.

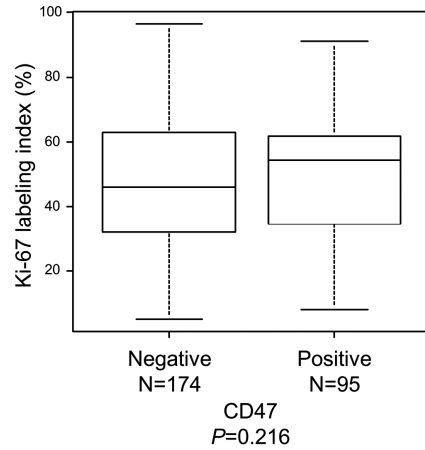

**Supplementary Figure S2.** The association of CD47 expression and Ki-67 labeling index in CRCs. Note that no association was detected between CD47 expression and Ki-67 labeling index ( $P = 0.216$ ).

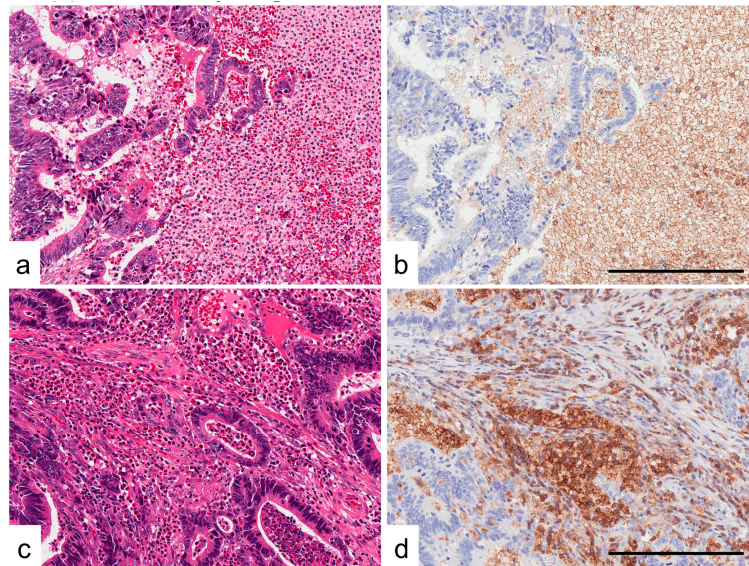

**Supplementary Figure S3.** Representative images for CRCs with granulocytes infiltration. (a) H&E and (b) SIRPA staining of a CRC case with neutrophil infiltration. (c) H&E and (d) SIRPA staining of a CRC case with eosinophil infiltration. Bar, 200  $\mu\text{m}$ .

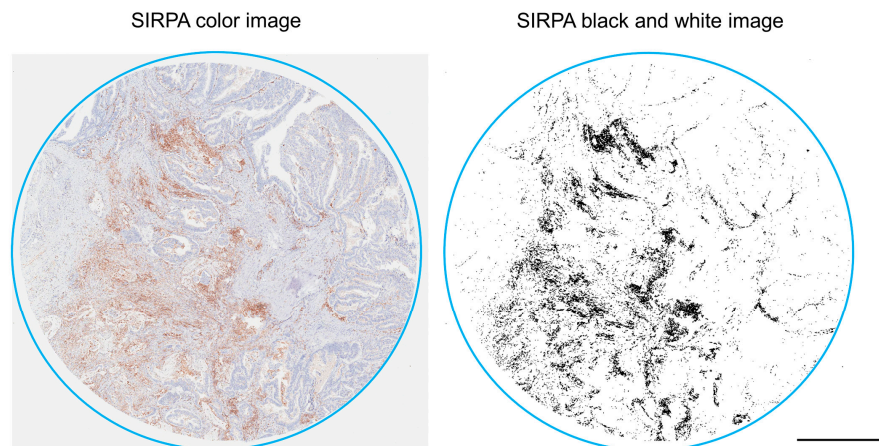

**Supplementary Figure S4.** Representative images for the measurement of SIRPA-positive area. Photographs for CD47 immunohistochemistry (left) were converted into black and white images (right). Black CD47-signals were measured by ImageJ software (NIH, Bethesda, MD). Bar, 1 mm.

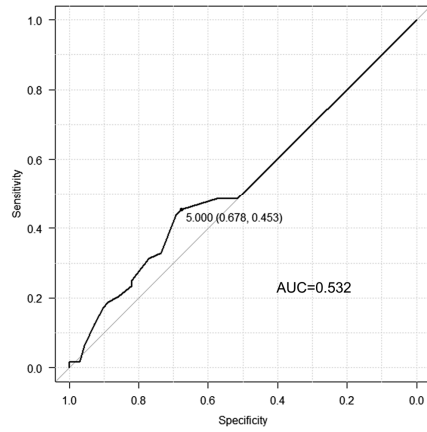

CD47

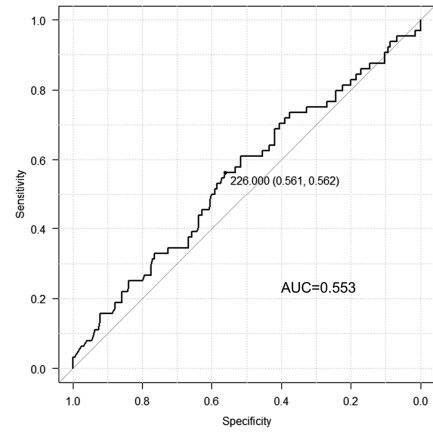

SIRPA

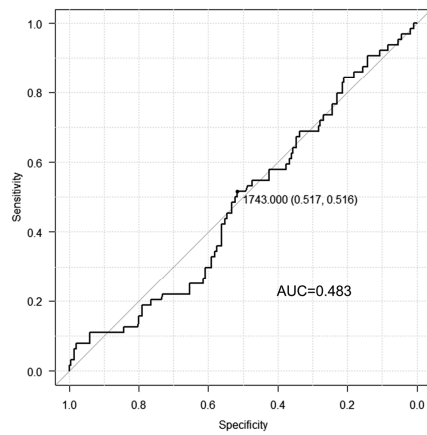

CD68

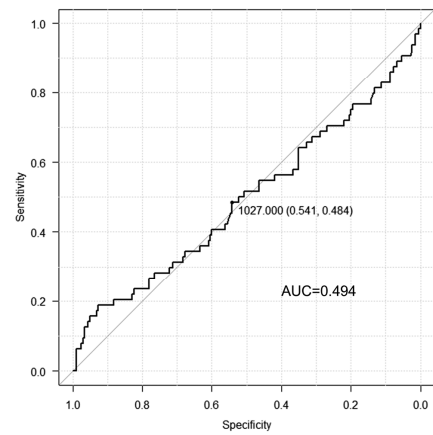

CD163

**Supplementary Figure S5.** ROC curves on survival of patients with CRC. ROC curves on survival of patients with CRC classified according to the expression of CD47, SIRPA, CD68, or CD163. The cut-off values for immunohistochemistry were defined using the value closest to the upper-left corner.
